# Supplementary material for: High-performance H 2 S gas sensor utilizing MXene/MoS 2 heterostructure synthesized via the Langmuir–Blodgett technique and chemical vapor deposition
Source: Royal Society of Chemistry journal article supplement (doi:10.1039/d4ra07555b), 2024-01-01
Supplement: d4ra07555b1.pdf [file d4ra07555b1.pdf]

## Supporting Information

### Supporting Information for

## High-Performance H<sub>2</sub>S Gas Sensor Based on MXene/MoS<sub>2</sub> Heterostructure Fabricated by Langmuir-Blodgett and Chemical Vapor Deposition

Jae Hyuk Shin, Su Hun Jo, Hyejin Rhyu, Chanwon Park, Myung Hyun Kang\*, Wooseok Song, Sun Sook Lee, Jongsun Lim, and Sung Myung\*

- Thin Film Materials Research Center, Korea Research Institute of Chemical Technology (KRICT), 141 Gajeong-ro, Yuseong-gu Daejeon 34114, Republic of Korea
- Advanced Materials Division, Korea Research Institute of Chemical Technology (KRICT), 141 Gajeong-ro, Yuseong-gu Daejeon 34114, Republic of Korea
- Department of Advanced Material Science and Engineering, Sungkyunkwan University, Suwon 16419, Republic of Korea

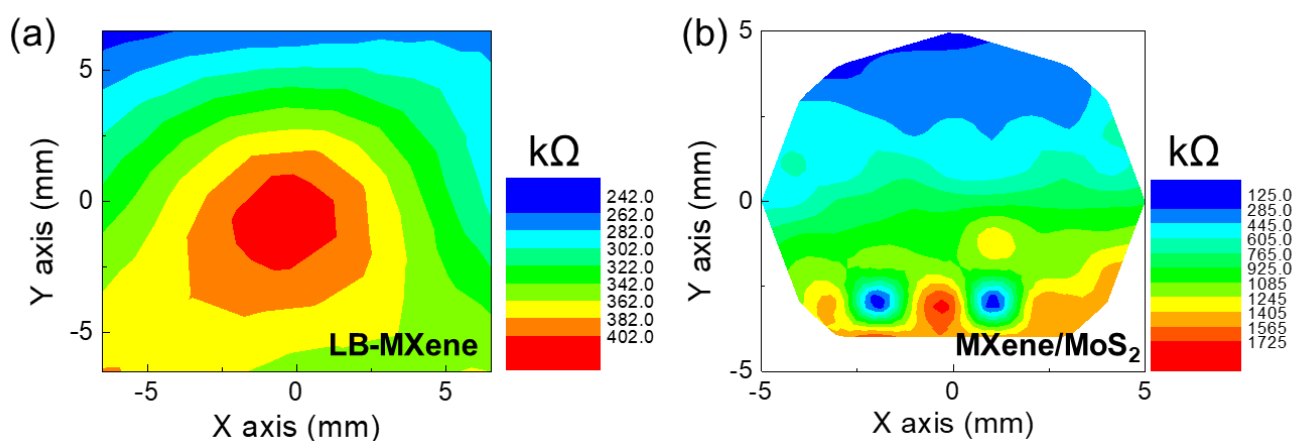

**Figure S1.** Sheets resistance of (a) LB-MXene film and (b) MXene/MoS<sub>2</sub> on SiO<sub>2</sub>/Si.

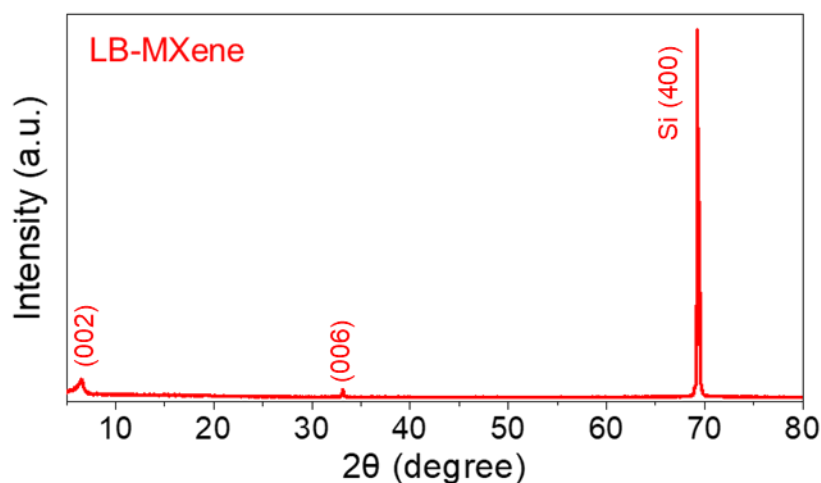

**Figure S2.** XRD patterns of LB-MXene.

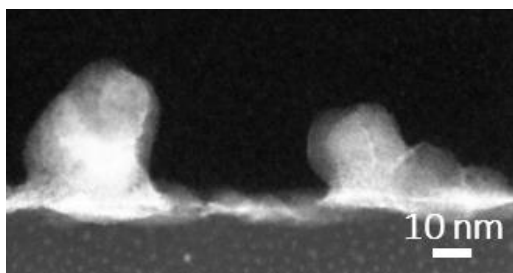

Figure S3. STEM image of MXene/MoS<sub>2</sub>

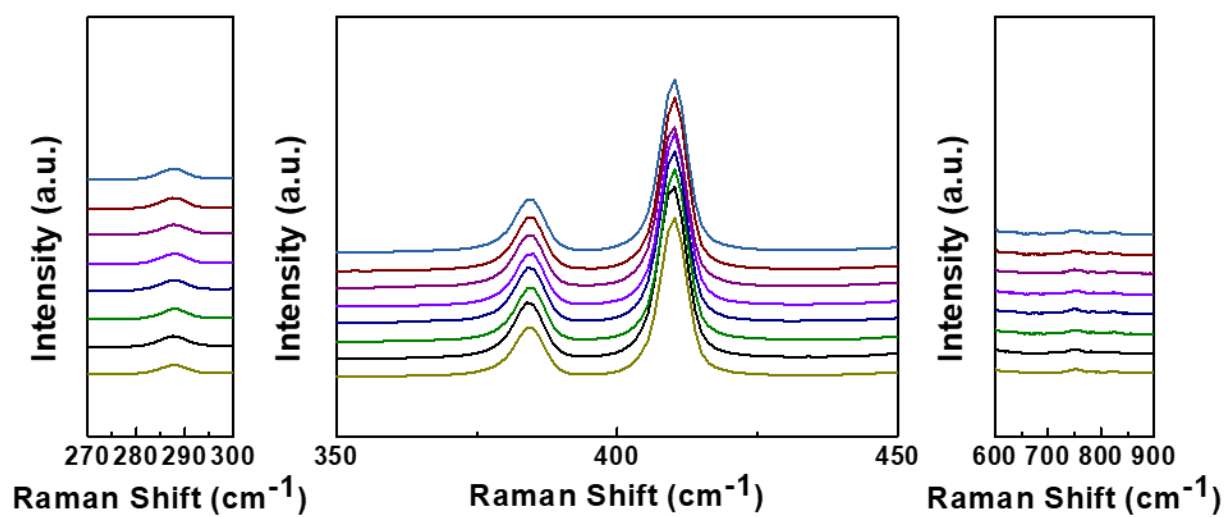

Figure S4. Raman spectra of 8 random sites on MXene/MoS<sub>2</sub>.

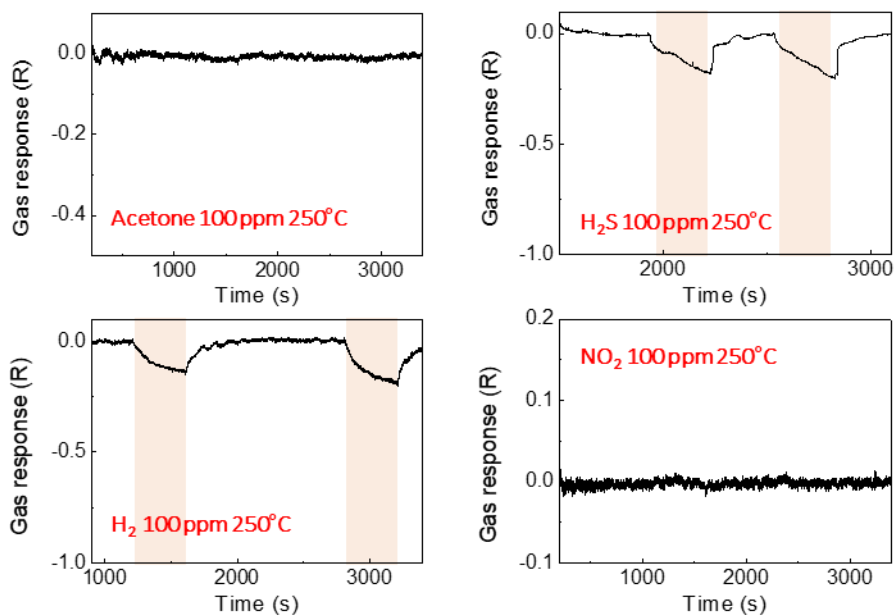

**Figure S5.** Gas sensing performances of pristine MoS<sub>2</sub> for various gas (Acetone, H<sub>2</sub>S, H<sub>2</sub>, NO<sub>2</sub>).

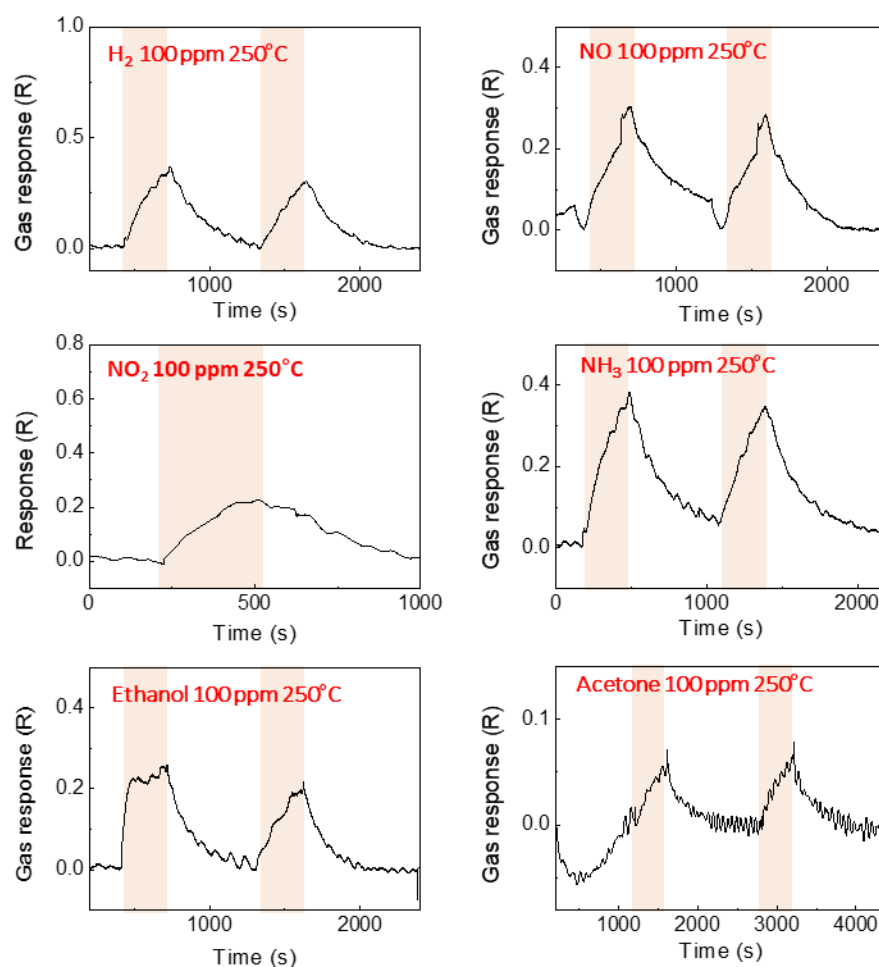

**Figure S6.** Gas sensing performances of MXene/MoS<sub>2</sub> for various gas (H<sub>2</sub>, NO<sub>2</sub>, EtOH, NO, NH<sub>3</sub>, Acetone).

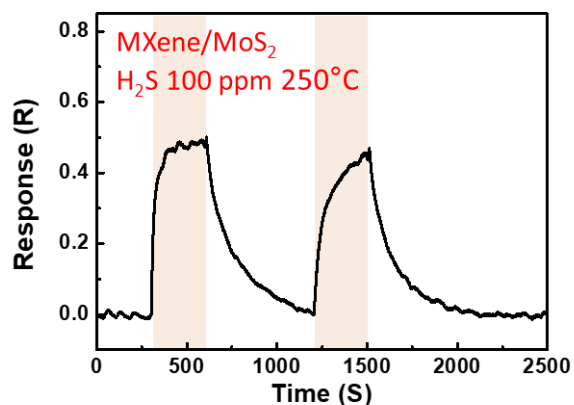

Figure S7. Reproducibility of MXene/MoS<sub>2</sub> gas sensor.

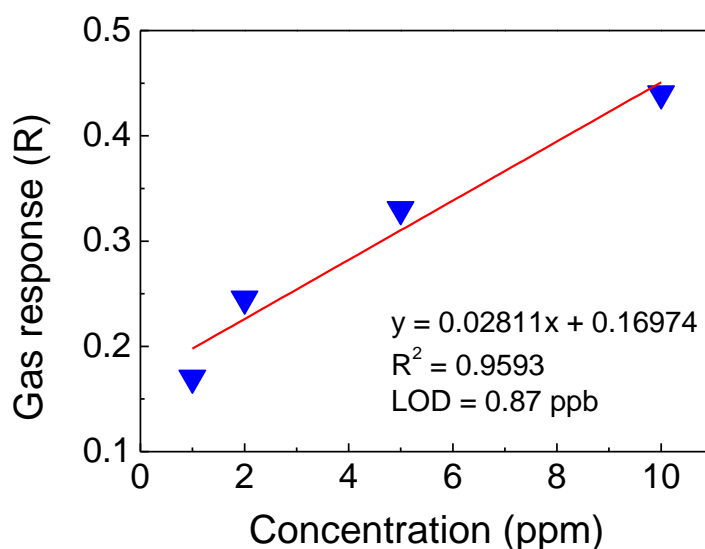

Figure S8. Calculation of limit of detection (LOD) based on H<sub>2</sub>S gas response at different concentrations for MXene/MoS<sub>2</sub>.

Here, LOD for the gas performance was calculated using the following formula:  $\text{LOD}(\text{ppb}) = 3.3 \frac{\text{RMS}}{\text{Slope}}$ .
